# Supplementary material for: Luminescent terbium(iii) complexes with pendant crown ethers responding to alkali metal ions and aromatic antennae in aqueous solution
Source: Royal Society of Chemistry journal article supplement (doi:10.1039/b206561b), 2002-01-01
Supplement: b206561b.doc [file b206561b.doc]

**Supplementary Material (ESI) for Chemical Communications**

**This journal is © The Royal Society of Chemistry 2002**

Luminescent terbium(III) complexes with pendant crown ethers responding to alkali metal ions and aromatic antennae in aqueous solution

Cong Li and Wing-Tak Wong*

Department of Chemistry and Open Laboratory of Chemical Biology of the Institute of Molecular Technology for Drug Discovery and Synthesis, The University of Hong Kong, Pokfulam Road, Hong Kong, P. R. China. Fax: +852 2547 2933; Tel: +852 2859 2157; E-mail: wtwong@hkucc.hku.hk

General experimental procedure, syntheses and characterisation of complexes **1**–**11.**

**General Experimental Procedure**

Fast atom bombardment (FAB) mass spectra was obtained on a Finnigan Mat 95 mass spectrometer. Electron Spray Ionization (ESI) mass spectra was obtained on a LCQ quadrupole ion trap mass spectrometer. 1H NMR spectra were recorded on DPX300 Bruker FT-NMR spectrometer and AV400 Bruker FT-NMR spectrometer with chemical shifts (in ppm) relative to tetramethylsilane. UV-vis spectra were recorded on a Hewlett Packard 8453 UV/vis spectrophotometer. Excitation, Emission spectra and luminescence lifetime measurements were all obtained on a Perkin-Elmer LS 50B spectrofluorimeter having a 420 nm cut off filter. The pH was monitored using a Mettler Toledo DT120 glass electrode equipped with temperature sensor (PT100, class B) operated through a Mettler Toledo MP120 pH meter, calibrated prior to use standard buffer solutions of pH 7.0 and pH 4.0 at 25C. The [Me4N]Cl at a concentration of 2 M, to maintain an approximately constant ionic strength during the titration. Luminescent quantum yields were referenced with Quinine sulfate (0.05 M) in water ( = 0.55) and extrapolated to infinite dilution. Estimated error is  15 %.

**Synthesis and characterisation of the compounds 1-11**

1. *N*-Chloroacetyl-aza-15-crown-5 (1)

Aza-15-crown-5 (300.0 mg, 1.368 mmol) was dissolved in anhydrous dichloromethane (20 mL), triethylamine (207.1 mg, 2.052 mmol) and then chloroacetyl chloride (231.7 mg, 2.052 mmol) was added. The reaction mixture was stirred at room temperature for 1 h. The organic layer was then washed by water (2  20 mL), dried by anhydrous Na2SO4 and evaporated under reduced pressure. Purification of this material was achieved by column chromatography on aluminium oxide eluting with ethyl acetate: hexane = 5: 6 (V/V). The product was isolated as a colourless oil (279.0 mg, 1.204 mmol). Yield: 88%. 1H NMR(400 MHz, CDCl3):  4.14 (2H, s, CO-C*H*2-Cl), 3.79 (2H, t, J = 5 Hz, N-C*H*2-CH2), 3.62-3.48 (18H, m, O-C*H*2). 13C NMR(CDCl3):  167.2, 71.6, 70.5, 70.4, 70.3, 70.1, 70.0, 69.4, 68.9, 51.0, 50.1, 41.6. ESI MS: *m/z* 232.4

2. 1-(*N*-acetyl-aza-15-crown-5)-1,4, 8, 11-tetraazacyclotetradecane (2)

115.5 mg (0.500 mmol) 1 dissolved in 10 mL anhydrous acetonitrile was added dropwise to a mixture of cyclam (250.0 mg, 1.250 mmol), potassium carbonate (5 equiv.) in 40 mL warm anhydrous acetonitrile under the N2 atmosphere for about half an hour. The mixture was allowed to stirred at 60-65C for about 8 h. the solution was filtrated under reduced pressure and the filtrate was evaporated to leave a crude oil which was purified by column chromatography on aluminium oxide with CHCl3 : MeOH = 100 : 15 as eluent. The product 2 was isolated as colourless oil (197.6 mg, 0.43 mmol, 86%). 1H NMR(400 MHz, CDCl3):  6.42-6.05 (3H, br, N-*H*), 3.67-3.33 (22H, m, O-C*H*2, CO-C*H*2-N), 3.05-2.58 (16H, m, N-C*H*2), 1.90-1.71 (4H, m, N-CH2-C*H2*-CH2-N). 13C NMR(CDCl3):  172.2, 70.6, 70.2, 70.0, 69.9, 69.6, 69.3, 68.8, 56.8, 55.2, 55.0, 49.8, 49.7, 49.6, 248.7, 48.6, 47.8, 45.8, 45.3, 25.5, 23.5. MS(ESI): *m/z* 460.4 [M+H]+; HRMS(EI) Calcd. for C22H45N5O5 459.34207, found: 459.34207.

**3. 1-(*N*-ethyl-aza-15-crown-5)-1,4, 8, 11-tetraazacyclotetradecane (3)**

A solution of compound **2** (100.0 mg, 0.224 mmol) in anhydrous THF (15 mL) was added slowly to BH3∙THF (20 mL, 1M, 20 mmol) at room temperature. The reaction mixture was heated at reflux for 4 h and the solution was allowed to cool and excess borane was destroyed by careful addition of methanol. The THF was removed under reduced pressure and the residue hydrolysed in refluxing MeOH-H2O-Conc. HCl (4 : 1 : 1) 40 mL for 1 h. the methanol was removed under reduced pressure and the resulting solution was treated with 30% aqueous NaOH until the pH to 11-12, the aqueous layer was extracted by dochloromethane (3  50 mL) and the combined organic layers dried by anhydrousNa2SO4. After the solvent evaporated under vacuo, the resulting residue was purified by column chromatography on aluminium oxide (eluting with CH2Cl2 : MeOH = 100 : 5). The compound 3 was isolated as a colourless oil (71.8 mg, 0.161 mmol, 72%). 1H NMR(400 MHz, CDCl3):  5.38-5.03 (3H, br, N-*H*), 3.57-3.51 (16H, m, O-C*H*2), 2.97-2.82 (11H, m, N-C*H*2), 2.66-2.45 (13H, m, N-C*H*2), 1.78-1.77 (4H, m, N-CH2-C*H2*-CH2-N). 13C NMR(CDCl3):  270.1, 469.8, 269.0, 255.1, 53.8, 53.7, 53.4, 50.6, 49.9, 49.0, 48.1, 47.5, 46.2, 45.9, 25.5, 23.5. MS(ESI): *m/z* 446.5 [M+H]+; HRMS(EI): Calcd. for C22H47N5O4 445.36280, found: 445.36281.

4. 1-(*N*-ethyl-aza-15-crown-5)-4,8,11-tris(tert-butoxycarbonylmethyl)-1,4,8,11-tetraaza-cyclotetradecane (4)

*Tert*-Butyl bromoacetate (3.3 equiv.) was added to 1-(*N*-ethyl-aza-15-crown-5)-1,4,8,11-tetraazacyclotetradecane **3** (100.0 mg, 0.224 mmol) in a mixture of THF-water (10:1) and sodium carbonate (4 equiv.). After stirring overnight at room temperature, the solvent was evaporated in *vacuo*. The residues was purified by column chromatography on silica gel (CH3Cl: CH3OH = 50:1) to give a colourless oil. Yield: 143.0 mg, 81%. 1H NMR (400 MHz, CDCl3):  3.58-3.35 (16 H, m, O-C*H*2), 3.26-2.17 (6 H, s, N-C*H*2-CO), 3.11-2.64 (24H, m, N-C*H*2), 1.86-1.77 (4 H, br, N-CH2-C*H2*-CH2-N), 1.45 (27H, s, CH3). 13C NMR: 170.7, 169.9, 164.5, 81.3, 281.0, 269.9, 469.7, 268.8, 55.7, 55.6, 255.1, 52.6, 51.9, 51.5, 250.9, 50.8, 250.6, 250.3, 49.8, 928.1, 25.2, 22.6. MS(ESI): 788.5 [M+H]+, HRMS(EI): Calcd. for C40H77N5O10 787.56704, found: 787.56704.

5. 1-(*N*-ethyl-aza-15-crown-5)-4,8,11-tris(acetic acid)-1,4,8,11-tetraazacyclotetradecane (5, L1).

1-(*N*-ethyl-aza-15-crown-5)-4,8,11-tris(tert-butoxycarbonylmethyl)-tetraazacyclote-tradecane 4 (78.8 mg, 0.1 mmol) was dissolved in 15 mL anhydrous dichloromethane, the 10 mL TFA was added to the solution under the N2 for about 6 h. the solvent was evaporated and the residue was dissolved in 3 mL methanol, 30 mL diethyl ether was added dropwise and the white percipitate was collected by careful centrifugation. Yield: 93%. 1H NMR (400 MHz, D2O, pH = 6):  3.80-3.71 (8 H, m, O-C*H*2-CH2-N, CO-C*H*2-N), 3.67-3.53 (12 H, m, O-C*H*2-C*H*2-O), 3.47-3.15 (16H, m, CO-C*H*2-N, O-CH2-C*H*2-N, C*H*2-N), 3.10-2.69 (10 H, m, C*H*2-N), 1.96-1.82 (4 H, br, N-CH2-C*H*2-CH2-N). 13C NMR: 174.0, 2170.6, 269.4, 268.9, 268.4, 263.4, 55.7, 55.5, 354.7, 52.5, 52.3, 52.2, 52.1, 51.8, 50.7, 50.4, 49.4, 47.9, 46.3, 22.1, 21.7. Calcd. for C28H53N5O10: MS (ESI) *m/z* 620.4 [M+H]+, 642.5 [M+Na]+; HRMS (ESI) Calcd. for [M+H]+ C28H54N5O10 620.3870, found: 620.3841, Calcd. for [M+Na]+ C28H53N5O10Na 642.3690, found: 642.3666.

**6. Tb3+ complex of L1 (6, TbL1)**

1-(*N*-ethyl-aza-15-crown-5)-4,8,11-tris(acetic acid)-1,4,8,11-tetraazacyclotetra-decane (L1) (100 mg, 0.16 mmol) was dissolved in 30 mL distilled water, the temperature was controlled at 60 Cand terbium carbonate hydrate (120.0 mg, 0.24 mmol) was added. After 5 h, the solution was filtered through a Celite plug to remove the excess terbium carbonate. The solvent was evaporated by vacua. The crude product was dissolve in methanol, adding the diethyl ether carefully and obtain the product as white solid (very hygroscopic and stored in a desiccator under inert gas). Yield: 92% (116.1 mg, 0.15 mmol). MS (ESI) *m/z* 776.6 [M+H]+; Calcd. For C28H51N5O10Tb·5 H2O: C 38.80, H 7.09, N 8.08%, found: C 38.48, H 6.77, N 8.01%.

**7. 2-(2-bromoethoxyl)-methyl –15-crown-5** **(7)**

300.0 mg (1.2 mmol) of hydromethyl-15-crown-5 and 75.0 mg (0.4 mmol) triethylbenzyl ammonium chloride were added to 10 mL 2-bromothanol at the same time. Then 5 mL 50% sodium hydroxide aqueous solution was also been added to the former solution and stirred vigorously at 50C for about 12 h. After the mixture was cool down, 10 mL CH2Cl2 and 10 mL H2O was added respectively. Collected the organic and aqueous phase separately after extraction. The aqueous phase was extracted by dichloromethane for 2-3 times again, combination the organic solution and evaporate the solvent to give crude product as a yellow oil, which was purified by column chromatography on aluminum oxide (neutral, 70-230 mesh) with ethyl acetate: hexane =7:3 as eluent. This yielded a pale viscous oil (287 mg, 67%). 1H NMR(400 MHz, CDCl3):  3.64 (23H, m, O-C*H*2), 3.44 (2H, t, J=6 Hz, CH2-C*H*2-Br). 13C NMR(CDCl3):  78.7, 71.5, 71.4, 71.2, 71.1, 70.9, 70.8, 70.7, 70.6, 70.5. 70.4, 70.3, 30.5. MS(ESI): *m/z* 357 [M+H]+, 379 [M+Na]+.

**8. 1-(2-ethoxyl methyl –15-crown-5)-1,4,8,11-tetraazacyclotetradecane (8)**

35.7 mg (0.1 mmol) **7** dissolved in 10 mL anhydride acetonitrile was added drop wise to a solution of cyclam (40.0 mg, 0.2 mmol) in 40 mL warm dry acetonitrile under the N2 atmosphere for about 30 min. The mixture was stirred at 55-60 C for about10h, K2CO3 was used as a base in this process. The reaction process was monitored by TLC (Al2O3, chloroform/methanol, 100:5) by noting the production of compound **7** (Rf = 0.35). After filtration, the filtrate was evaporated to leave a crude oil which was purified by column chromatography on aluminum oxide (neutral, 70-230 mesh) with ethyl acetate: methanol = 4 : 1 as eluent. This yielded a colourless viscous oil (29.0 mg, 62 %). 1H NMR(400 MHz, CDCl3): ** 5.25-5.10(br, N-*H*), 3.79-3.58 (23H, m, O-C*H*2-C*H*2-O), 3.23- 2.81 (18H, m, N-C*H*2-CH2), 1.97-1.93 (4H, m, N-CH2-C*H*2-CH2-N). 13C NMR(CDCl3): ** 77.9, 71.5, 70.8, 70.7, 70.6, 270.5 , 270.4, 70.3, 69.6, 68.7, 54.6, 52.3, 52.2, 49.7, 49.3, 47.7, 47.1, 45.8, 45.3, 25.1, 23.2. Anal Calcd. for C23H48O6N4: MS (ESI): *m/z* 477.5 [M+H]+; HRMS (EI): Calcd. for C23H48O6N4 476.35739, found: 476.35739.

**9. 1-(2-ethoxylmethyl–15-crown-5)-4,8,11-tris(tert-butoxycarbonylmethyl)-1,4,8,11-tetraazacyc-lotetradecane (9)**

*Tert*-Butyl bromoacetate (4 equiv.) was added to 1-(2-ethoxylmethyl-15-crown-5)-1,4,8,11-tetraazacyclotetradecane **8** (48.0 mg, 0.1 mmol) in a mixture of THF-water (10:1) and sodium carbonate (4 equiv.) used for base. After stirring overnight at room temperature, 50 mL chloroform was added and the organic phase was separated, dried by anhydrous MgSO4 and evaporated *in vacua*. The residue was purified by column chromatography on silica gel (CH3Cl: CH3OH 10:2) to give colourless oil. Yield: 70.0 mg, 86%. 1H NMR (400 MHz, CDCl3):  4.21-3.64 (23H, m, O-C*H*2), 3.60-2.56 (24H, m, N-C*H*2), 2.18-1.84 (4H, m, N-CH2-C*H*2-CH2-N), 1.45 (27H, s, CH3). 13C NMR: 170.2, 169.9, 164.5, 84.9, 82.1, 81.9, 77.7, 70.7, 70.3, 70.2, 69.8, 69.7, 69.6, 69.4, 68.4, 68.2, 65.7, 54.3, 54.0, 53.8, 53.6, 253.4, 53.3, 52.8, 52.4, 52.0, 51.6, 48.9, 48.8, 928.1, 22.6, 22.5. Calcd. for C41H78O12N4: MS(ESI): *m/z* 819.4 [M+H]+; HRMS (EI): Calcd. for C41H78O12N4 818.56162, found: 818.56162.

**10. 1-(2-Ethoxylmethyl-15-crown-5)-4,8,11-tris(acetic acid)-1,4,8,11-tetraazacyclotetra-decane (10, L2):**

1-(2-ethoxylmethyl-15-crown-5)-4,8,11-tris(tert-butoxycarbonylmethyl)-1,4,8,11-tetraazacyclotetradecane **9** (82.0 mg, 0.1mmol) was dissolved in 10 mL anhydrous CH2Cl2, then 5 mL TFA was added to the solution under the protection of N2, this mixture was stirred overnight at the room temperature. Evaporated the solvent *in vacua*, the residue was taken up in 3 mL methanol and 30 mL diethyl ether added dropwise. the white precipitate was isolated by careful centrifugation. Yield: 59.3 mg, 92%. 1H NMR(400 MHz, D2O):  3.72-3.60 (6H, m, N-C*H*2-CO), 3.60-3.45 (20H, m, O-C*H*2), 3.44-3.22 (13H, m, N-C*H*2), 2.97-2.92 (4H, m, N-C*H*2), 2.71-2.68 (4H, m, N-C*H*2), 1.90-1.78 (4H, m, N-CH2-C*H*2-CH2-N) 13C NMR (D2O): 178.9, 178.8, 168.5, 77.2, 70.9, 70.1, 70.0, 69.7, 269.6, 69.5, 69.4, 68.8, 67.8, 59.6, 59.5, 59.4, 54.0, 50.9, 250.6, 50.5, 50.2, 47.8, 47.6, 47.5, 46.9, 20.9, 20.3. Calcd. for C29H54O12N4: MS (ESI): *m/z* 651.4 [M+H]+, 673.3 [M+Na]+; HRMS(EI): Calcd. for [M-H]- C29H53O12N4 649.36599, found: 649.36599.

**11. Tb3+ complex of L2 (11, TbL2)**

1-(2-ethoxylmethyl-15-crown-5)-4,8,11-tris(acetic acid)-1,4,8,11-tetraazacyclotetradecane (L2) (100.0 mg, 0.15 mmol) was dissolved in 30 mL distilled water, the temperature was controlled to 60 Cand terbium carbonate hydrate (120.0 mg, 0.24 mmol) was added. After 5 h, the solution was filtered through a Celite plug to remove the excess Terbium carbonate. The solvent was evaporated by vacua. The crude product was dissolve in methanol, adding the diethyl ether carefully and obtain the product as white solid (hygroscopic and stored in a desiccator under inert gas). Yield: 92% (113.1 mg, 0.14 mmol). MS(ESI): *m/z* 807.4 [M+H]+; Calcd. for C29H51O12N4Tb·3 H2O: C 40.47, H 6.67, N 6.51, found: C 40.25, H 6.33, N 6.38%.
